# Supplementary material for: In silico functional dissection of saturation mutagenesis: Interpreting the relationship between phenotypes and changes in protein stability, interactions and activity
Source: PubMed Central journal article supplement (PMC4726175; doi:10.1038/srep19848), 2016-01-22
Supplement: srep19848-s1.pdf [file srep19848-s1.pdf]

## Supplementary Material

### ***In silico* functional dissection of saturation mutagenesis: Interpreting the relationship between phenotypes and changes in protein stability, interactions and activity**

Douglas E V Pires<sup>1,2,\*</sup>, Jing Chen<sup>1</sup>, Tom L Blundell<sup>1</sup>, David B Ascher<sup>1,\*</sup>

<sup>1</sup>Department of Biochemistry, Sanger Building, University of Cambridge, 80 Tennis Court Road, Cambridge, CB2 1GA, UK.

<sup>2</sup>Centro de Pesquisas René Rachou, Fundação Oswaldo Cruz, Avenida Augusto de Lima 1715, Belo Horizonte, 30190-002, Brazil

\* These authors contributed equally to this work

Correspondence should be addressed to D.B.A: Tel: +44 1223766033; Fax: +44 1223766002; mail: [dascher@svi.edu.au](mailto:dascher@svi.edu.au); Correspondence may also be addressed to [douglas.pires@cpqrr.fiocruz.br](mailto:douglas.pires@cpqrr.fiocruz.br)

## Supplementary Figures

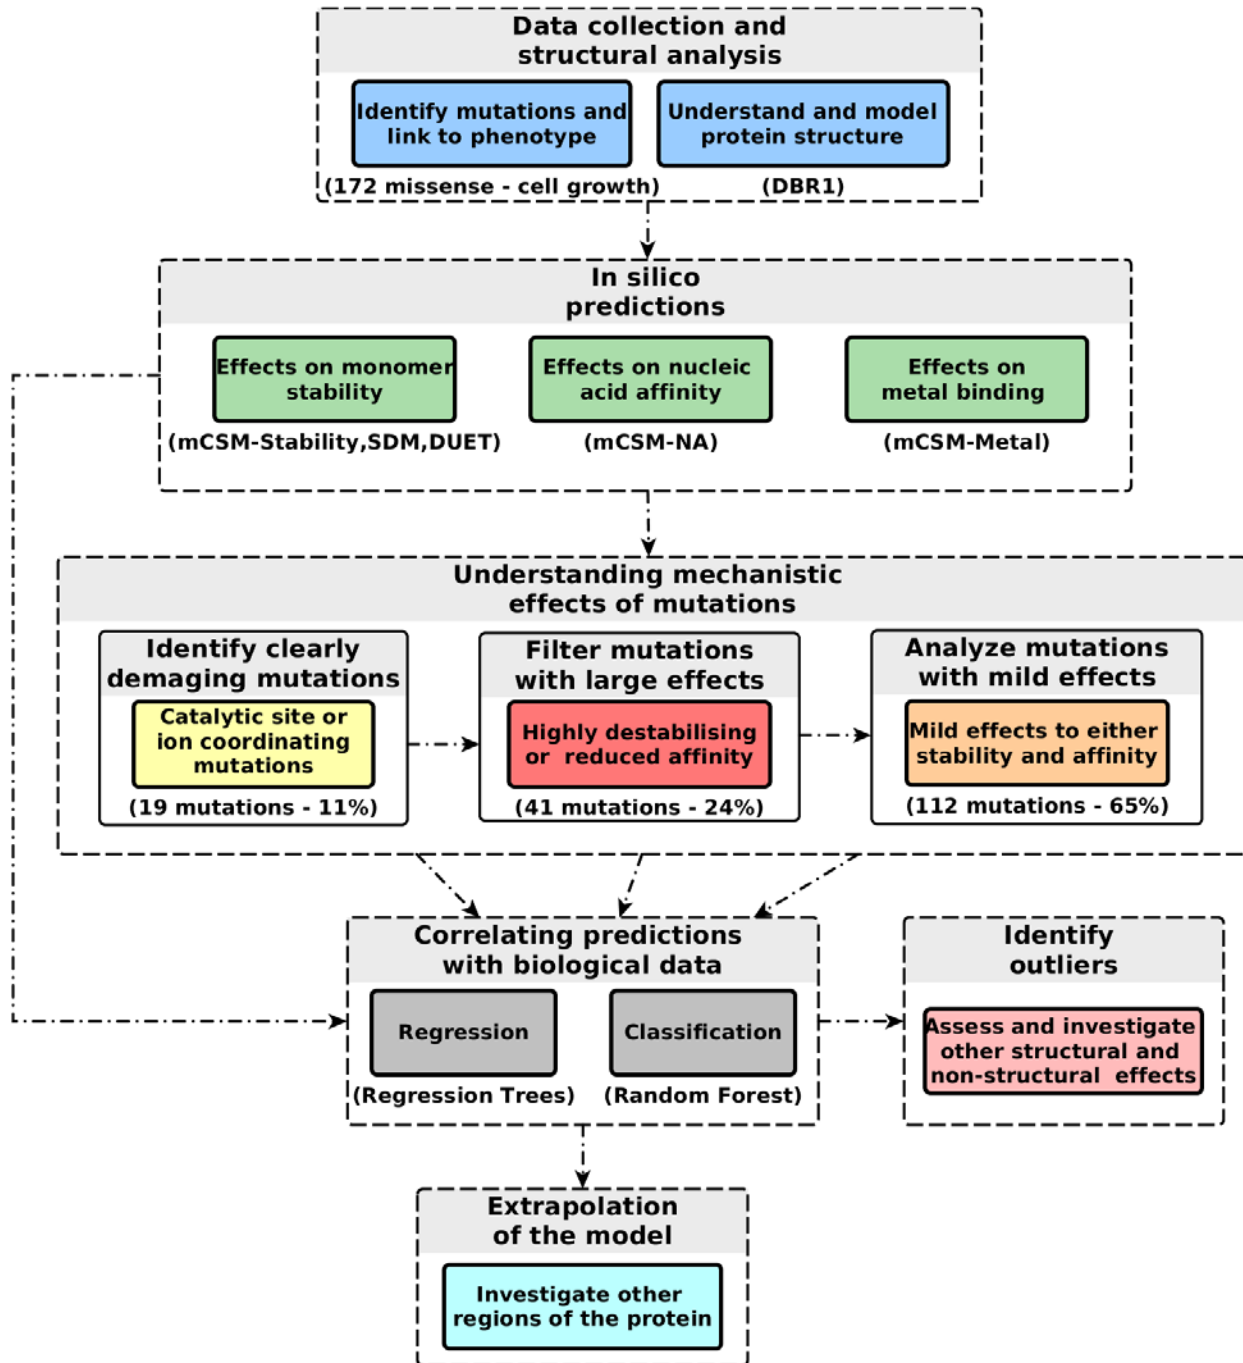

**Figure S1** Computational mutation analysis workflow applied to DBR1. The figure depicts the major steps of the methodology workflow applicable to DBR1, which can be divided into: data collection and structural analysis, *in silico* (quantitative) prediction of effects of mutations to stability, RNA binding and metal binding, filtering mutations by their predicted effect, building regression and classification models to link prediction with observed phenotype.

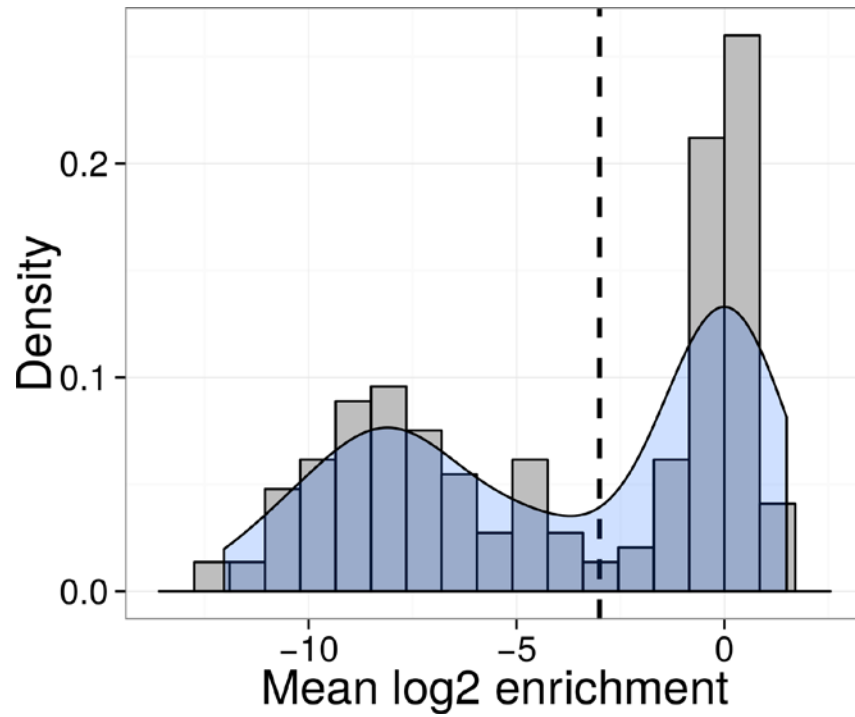

**Figure S2** Growth response distribution for the 172 analysed mutations on DBR1 in terms of the average log<sub>2</sub> enrichment score between replicates. The dashed vertical line shows the threshold used to group the mutations into two classes, low or no growth response (on the right) and high response (left group).

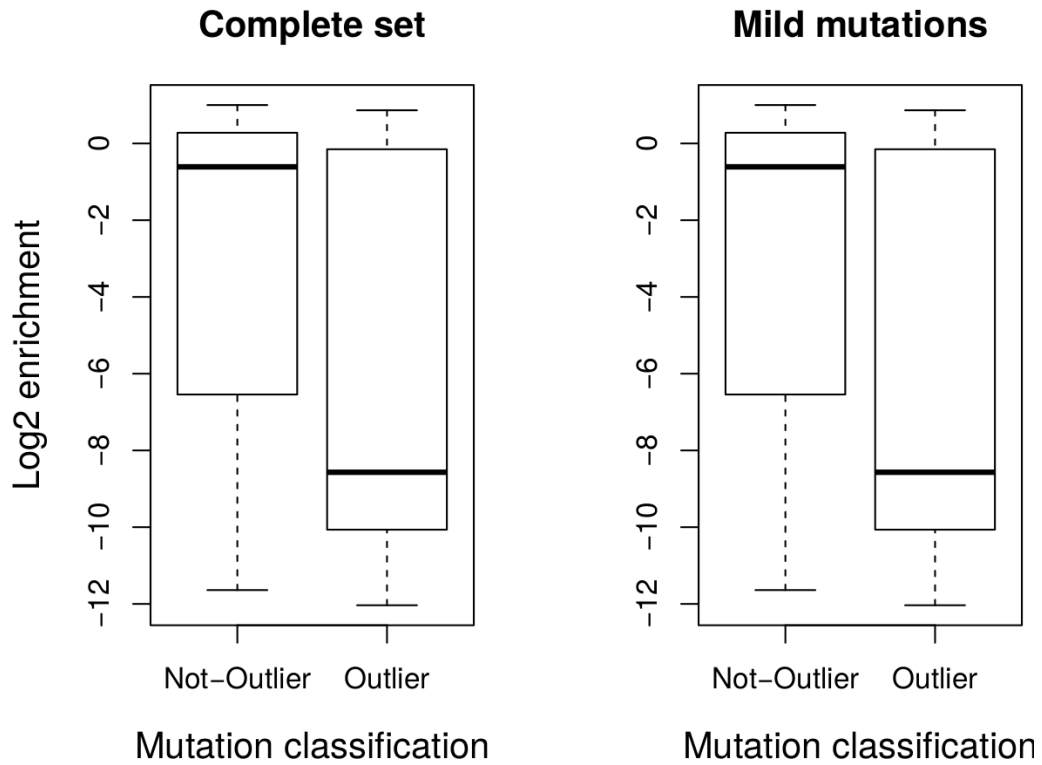

**Figure S3.** Boxplot of the  $\log_2$  enrichment scores between outlier mutations identified on regression tasks and the remaining ones for the complete set and for mild mutations on DBR1. On average, the outliers seem to be mutations with much lower values for growth reduction than the rest of the mutations.

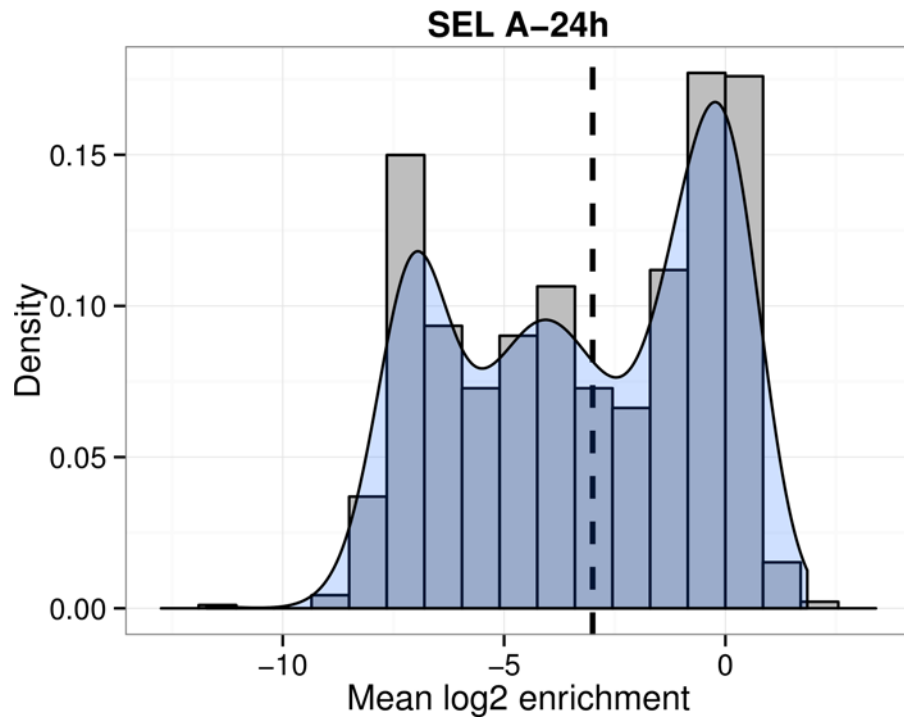

**Figure S4** Growth response distribution (average log<sub>2</sub> enrichment score) for the 1083 analysed mutations on Gal4. The dashed vertical line shows the threshold used to group the mutations into two classes, low or no growth response (on the right) and high response (left group).

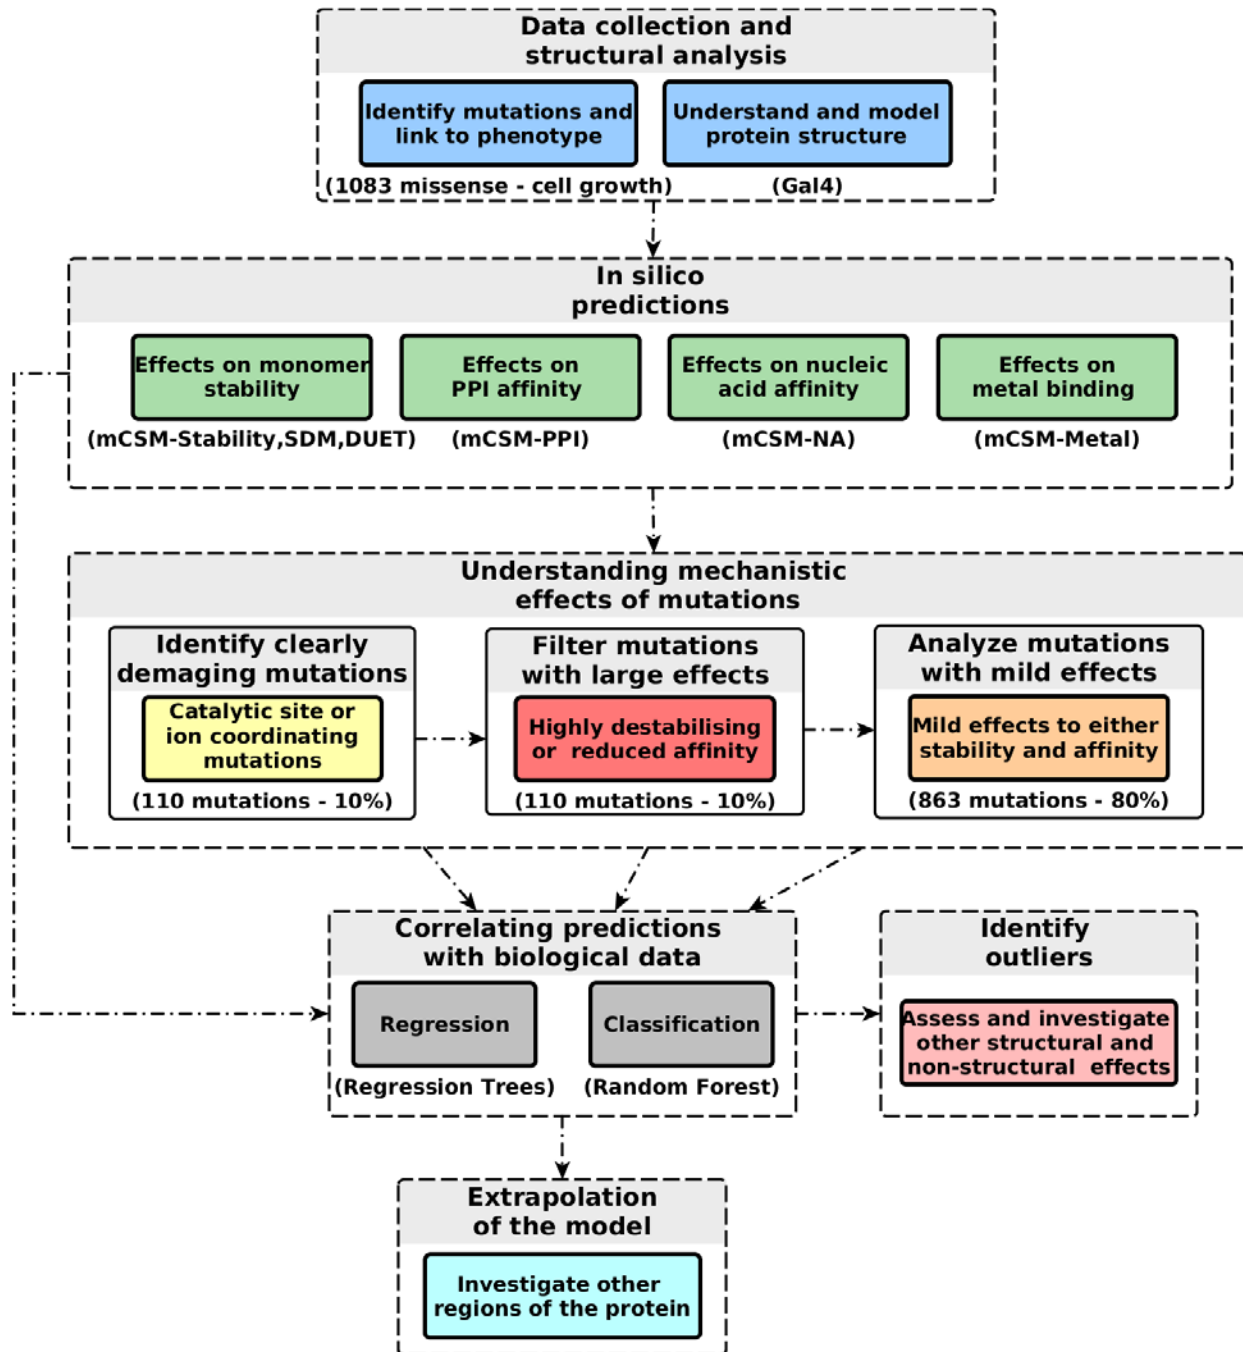

**Figure S5** Computational mutation analysis workflow applied to Gal4. The figure depicts the major steps of the methodology workflow applicable to Gal4, which can be divided into: data collection and structural analysis, *in silico* (quantitative) prediction of effects of mutations to stability, DNA binding, protein-protein affinity and metal binding, filtering mutations by their predicted effect, building regression and classification models to link prediction with observed phenotype.

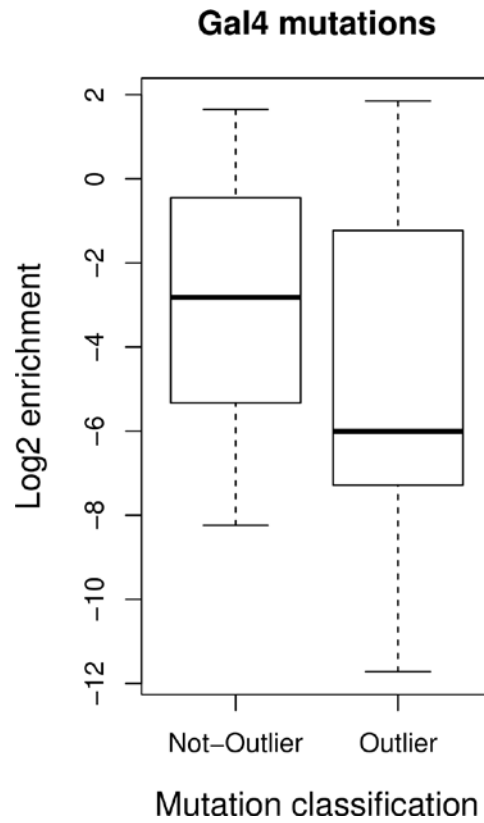

**Figure S6.** Boxplot of the  $\log_2$  enrichment scores between outlier mutations identified on regression tasks and the remaining ones for the complete set and for mild mutations on Gal4. On average, the outliers seem to be mutations with much lower values for growth reduction than the rest of the mutations.

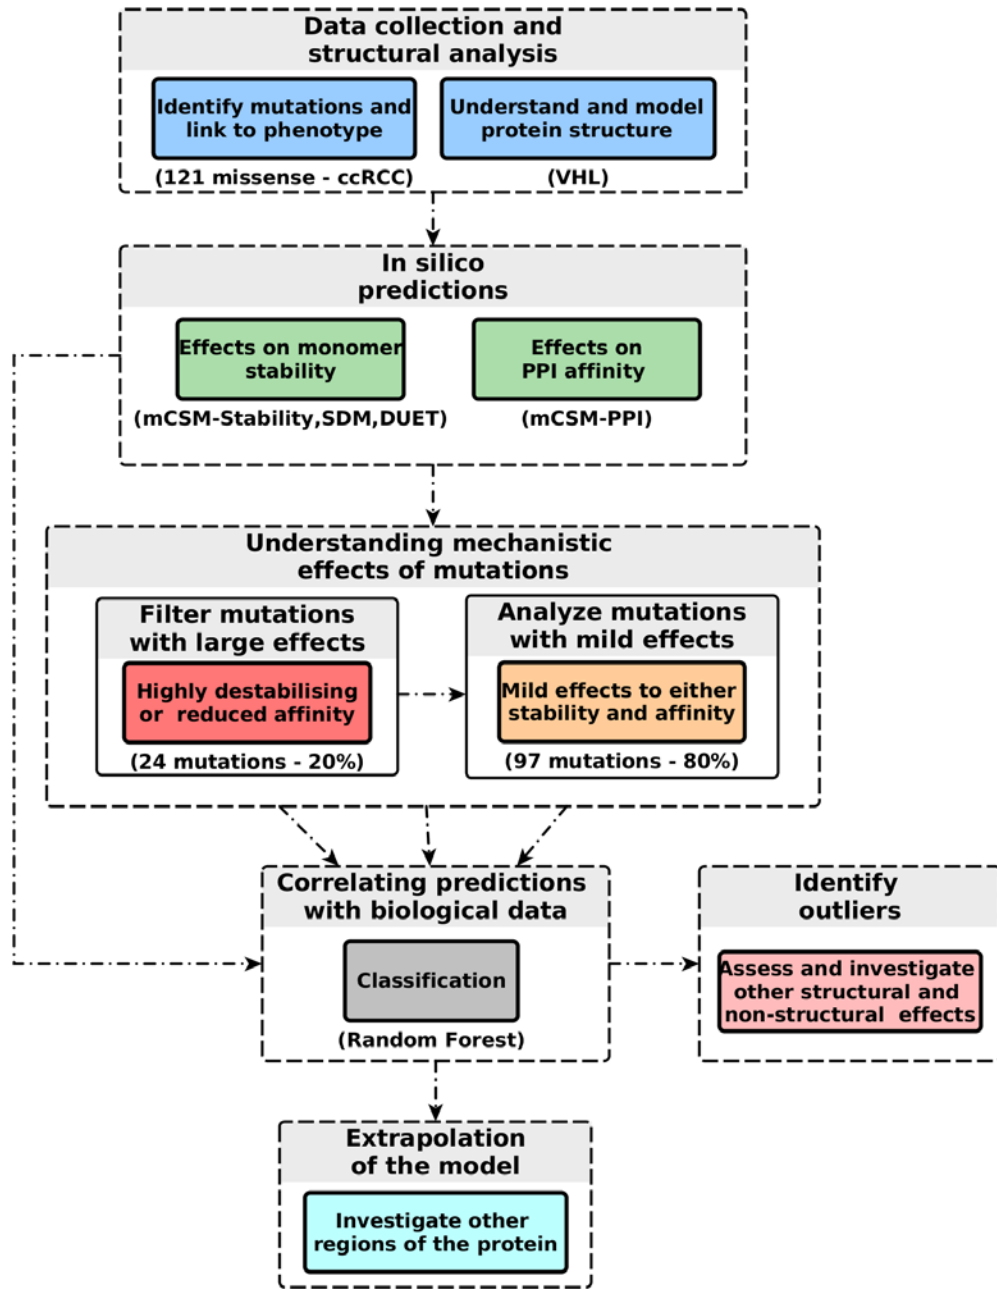

**Figure S7** Computational mutation analysis workflow applied to VHL. The figure depicts the major steps of the methodology workflow applicable to VHL, which can be divided into: data collection and structural analysis, *in silico* (quantitative) prediction of effects of mutations to stability, and protein-protein affinity, filtering mutations by their predicted effect, building classification models to link prediction with observed clinical outcome.



## Supplementary Tables

**Table S1. Pearson's correlation coefficients of individual stability and affinity change predictions and for the linear regression models for DBR1 and Gal4.**

|                  | DBR1 mild mutations | DBR1 mild mutations (-10% outliers) | All DBR1 mutations | All DBR1 mutations (-10% outliers) | All Gal4 mutations | All Gal4 mutations (-10% outliers) |
|------------------|---------------------|-------------------------------------|--------------------|------------------------------------|--------------------|------------------------------------|
| mCSM-Stability   | 0.22                | 0.22                                | <0.1               | <0.1                               | 0.21               | 0.36                               |
| mCSM-NA          | 0.48                | 0.54                                | 0.35               | 0.54                               | 0.11               | 0.22                               |
| mCSM-PPI         | N/A                 | N/A                                 | N/A                | N/A                                | 0.21               | 0.35                               |
| Regression model | 0.56                | 0.71*                               | 0.65*              | 0.81*                              | 0.69*              | 0.83*                              |

\*Denotes a significantly higher performance for the regression model compared to each of the individual methods by a Steigers's Z-test (two-tailed  $p < 0.05$ ).

**Table S2. Spearman rank correlation coefficients of final regression models for DBR1 and Gal4.**

|                       | Complete data set | After 10% outliers removal |
|-----------------------|-------------------|----------------------------|
| DBR1 (mild mutations) | 0.45              | 0.56                       |
| DBR1 (all mutations)  | 0.59              | 0.72                       |
| Gal4 a(all mutations) | 0.67              | 0.80                       |

**Table S3. Correlation between predicted stability changes upon mutation by other methods and log enrichment scores on DBR1.**

| Method     | Pearson Correlation Coefficient |
|------------|---------------------------------|
| PoPMuSiC 2 | -0.040                          |
| I-Mutant 2 | -0.155                          |
| FoldX      | -0.155                          |
| AUTOMUTE   | -0.003                          |

**Table S4. DBR1 mutations and predicted changes in stability and RNA binding affinity.**

| <b>MUTATION</b> | <b>AVG.<br/>log(enrichment)</b><br>From Findlay et al.,<br>(2014) | <b>mCSM_Stability</b><br>( $\Delta\Delta G$ kcal/mol) | <b>DUET</b><br>( $\Delta\Delta G$<br>kcal/mol) | <b>SDM</b><br>( $\Delta\Delta G$<br>kcal/mol) | <b>mCSM_NA</b><br>( $\Delta\Delta G$<br>kcal/mol) |
|-----------------|-------------------------------------------------------------------|-------------------------------------------------------|------------------------------------------------|-----------------------------------------------|---------------------------------------------------|
| N84A            | -10.7543                                                          | -0.604                                                | -0.646                                         | 1.48                                          | 0.356                                             |
| N84C            | -8.076                                                            | -0.011                                                | -0.057                                         | 1.63                                          | 0.972                                             |
| N84D            | -9.78325                                                          | -1.497                                                | -1.503                                         | -0.11                                         | 0.039                                             |
| N84E            | -10.0645                                                          | -1.291                                                | -1.285                                         | -0.42                                         | 0.042                                             |
| N84F            | -10.0192                                                          | -0.07                                                 | -0.207                                         | 2.2                                           | 0.491                                             |
| N84G            | -4.41012                                                          | -0.99                                                 | -1.257                                         | -1.31                                         | 0.354                                             |
| N84H            | -4.4005                                                           | -0.924                                                | -1.092                                         | 0.81                                          | 0.06                                              |
| N84I            | -8.77258                                                          | 0.422                                                 | 0.408                                          | 1.76                                          | 0.365                                             |
| N84K            | -4.8035                                                           | -0.42                                                 | -0.316                                         | -0.9                                          | 0.776                                             |
| N84L            | -8.66092                                                          | 0.422                                                 | 0.4                                            | 1.19                                          | 0.365                                             |
| N84M            | -9.35                                                             | 0.728                                                 | 0.542                                          | 1.48                                          | 0.362                                             |
| N84P            | -10.8435                                                          | 0.108                                                 | 0.086                                          | 1.14                                          | 0.362                                             |
| N84Q            | -8.62725                                                          | -0.764                                                | -0.714                                         | -0.27                                         | 0.508                                             |
| N84R            | -8.6664                                                           | -0.874                                                | -0.757                                         | 0.63                                          | 0.574                                             |
| N84S            | -8.0185                                                           | -1.165                                                | -1.153                                         | -0.88                                         | 0.969                                             |
| N84T            | -8.56888                                                          | -0.799                                                | -0.753                                         | -0.51                                         | 0.972                                             |
| N84V            | -12.0346                                                          | 0.108                                                 | 0.09                                           | 1.42                                          | 0.362                                             |
| N84W            | -6.03                                                             | -0.223                                                | -0.306                                         | 4.23                                          | 0.559                                             |
| N84Y            | -6.132                                                            | 0.137                                                 | 0.037                                          | 2.55                                          | 0.491                                             |
| H85A            | -6.54175                                                          | -0.971                                                | -1.038                                         | 1.4                                           | 1.122                                             |
| H85C            | -8.278                                                            | -0.341                                                | -0.334                                         | 2.14                                          | 1.738                                             |
| H85D            | -8.72125                                                          | -1.223                                                | -1.245                                         | 0.16                                          | 0.805                                             |
| H85E            | -6.58675                                                          | -1.1                                                  | -1.199                                         | -1.43                                         | 0.807                                             |
| H85F            | -11.6402                                                          | 0.551                                                 | 0.4                                            | 0.18                                          | 1.257                                             |
| H85G            | -8.6195                                                           | -1.309                                                | -1.589                                         | -2.54                                         | 1.119                                             |
| H85I            | -10.5615                                                          | 0                                                     | -0.166                                         | -0.45                                         | 1.13                                              |

|      |          |        |        |       |       |
|------|----------|--------|--------|-------|-------|
| H85K | -10.443  | -0.68  | -0.786 | -2.9  | 1.542 |
| H85L | -10.5171 | 0      | -0.096 | 1.3   | 1.13  |
| H85M | -9.3065  | -0.127 | -0.38  | 0.08  | 1.128 |
| H85N | -6.38025 | -0.97  | -1.129 | -1.45 | 1.271 |
| H85P | -8.00812 | -0.311 | -0.547 | -1.55 | 1.128 |
| H85Q | -4.60575 | -0.617 | -0.759 | -1.66 | 1.274 |
| H85R | -8.5957  | -1.15  | -1.187 | -1.24 | 1.34  |
| H85S | -8.13917 | -0.951 | -1.114 | -2.12 | 1.735 |
| H85T | -5.49483 | -0.742 | -0.859 | -1.17 | 1.738 |
| H85V | -7.50017 | -0.311 | -0.462 | 0.12  | 1.128 |
| H85W | -11.9565 | 0.686  | 0.561  | 2.04  | 1.325 |
| H85Y | -8.25    | 0.66   | 0.525  | 0.2   | 1.257 |
| E86A | -4.82825 | -2.508 | -2.576 | 0.78  | 2.758 |
| E86C | -8.062   | -1.601 | -1.635 | 0.84  | 3.374 |
| E86D | 0.27975  | -1.734 | -1.934 | -1.06 | 2.441 |
| E86F | -10.6537 | -2.58  | -2.446 | 2.46  | 2.893 |
| E86G | -7.80487 | -2.816 | -3.291 | -1.97 | 2.756 |
| E86H | -8.284   | -2.222 | -2.059 | 2.39  | 2.462 |
| E86I | -9.59567 | -1.613 | -1.531 | 3.78  | 2.767 |
| E86K | -7.7655  | -2.084 | -2.291 | -1.74 | 3.178 |
| E86L | -8.1825  | -1.613 | -1.567 | 2.47  | 2.767 |
| E86M | -11.718  | -0.834 | -0.832 | 4.32  | 2.764 |
| E86N | -0.43925 | -2.109 | -2.142 | 0.24  | 2.907 |
| E86P | -9.4505  | -1.902 | -2.309 | -1.79 | 2.764 |
| E86Q | -7.368   | -1.906 | -1.952 | 0.09  | 2.91  |
| E86R | -7.5337  | -1.817 | -1.759 | -0.15 | 2.976 |
| E86S | -8.39492 | -2.869 | -2.965 | -0.17 | 3.371 |
| E86T | -9.61625 | -2.55  | -2.635 | 0.23  | 3.374 |
| E86V | -7.19037 | -1.902 | -1.856 | 3.33  | 2.764 |
| E86W | -9.917   | -2.611 | -2.183 | 0.7   | 2.961 |
| E86Y | -6.999   | -2.412 | -2.285 | 1.7   | 2.893 |
| A87D | -7.1875  | -2.915 | -3.192 | -2.28 | 2.212 |

|      |          |        |        |       |        |
|------|----------|--------|--------|-------|--------|
| A87G | -1.287   | -1.476 | -1.975 | -4.78 | 2.527  |
| A87P | 0.1945   | -0.428 | -0.762 | -3.62 | 2.535  |
| A87S | 1.2885   | -1.81  | -2.029 | -2.71 | 3.143  |
| A87T | -4.5235  | -1.586 | -1.819 | -3.28 | 3.145  |
| A87V | -0.2275  | -0.428 | -0.438 | -0.53 | 2.535  |
| S88A | -3.9435  | -0.754 | -0.088 | 2.85  | 0.138  |
| S88L | -0.3725  | -0.016 | 0.594  | 2.43  | 0.147  |
| S88P | 0.5255   | -0.227 | -0.388 | -0.96 | 0.144  |
| S88T | -2.336   | -0.858 | -0.472 | 0.54  | 0.754  |
| N89H | -1.028   | -0.943 | -0.873 | 3.18  | 0.198  |
| N89I | -0.4665  | 0.382  | 0.614  | 2.71  | 0.093  |
| N89K | -0.054   | -0.317 | -0.152 | -0.48 | -0.116 |
| N89S | -0.007   | -1.217 | -1.162 | -0.58 | 0.042  |
| N89T | 0.2815   | -0.805 | -0.708 | -0.12 | -0.012 |
| N89Y | -0.0265  | 0.117  | -0.18  | 1.21  | 0.051  |
| H90D | -9.9325  | -2.178 | -2.283 | -1.73 | 0.089  |
| H90L | 0.752    | -0.844 | -0.748 | 2.15  | 0.936  |
| H90N | -0.5265  | -1.918 | -2.187 | -4.09 | 0.46   |
| H90P | -7.018   | -1.249 | -1.541 | -2.6  | 0.99   |
| H90Q | -0.34825 | -1.512 | -1.648 | -1.51 | 0.406  |
| H90R | -7.2685  | -0.994 | -1.044 | -1.95 | 0.73   |
| H90Y | -1.28    | 0.2    | 0.142  | -0.66 | 0.894  |
| L91F | -0.368   | -1.484 | -1.644 | -0.34 | 0.978  |
| L91M | -0.18    | -1.031 | -1.117 | -0.39 | 1.074  |
| L91S | 0.1295   | -3.044 | -3.199 | -3.49 | 0.969  |
| L91W | -8.5415  | -2.031 | -1.945 | 0.42  | 0.877  |
| Q92E | -0.133   | -1.215 | -1.156 | 0.15  | -1.109 |
| Q92H | 0.7      | -0.985 | -1.087 | 1.37  | -0.103 |
| Q92L | -0.09    | 0.608  | 0.873  | 3.08  | -0.208 |
| Q92P | -8.509   | 0.218  | -0.027 | -2.97 | -0.155 |
| Q92R | -0.623   | -0.87  | -0.744 | -0.43 | -0.414 |
| E93A | 0.8315   | -1.062 | -1.112 | 0.5   | 1.719  |

|      |          |        |        |       |        |
|------|----------|--------|--------|-------|--------|
| E93D | -3.48275 | -1.566 | -1.694 | -1.88 | 0.711  |
| E93G | -0.613   | -1.494 | -1.873 | -3.59 | 1.772  |
| E93K | -5.5725  | -1.589 | -1.607 | -0.92 | 1.349  |
| E93Q | 0.285    | -1.597 | -1.575 | -0.15 | 1.028  |
| E93V | 0.8645   | -0.231 | -0.201 | 0.49  | 1.612  |
| L94F | -1.32775 | -1.479 | -1.772 | 0.21  | -1.076 |
| L94I | 0.6695   | -0.896 | -0.948 | -0.28 | -1.034 |
| L94S | -1.6275  | -2.674 | -2.882 | -2.25 | -1.085 |
| L94V | -0.5175  | -1.387 | -1.637 | -1.32 | -0.98  |
| P95H | -0.2375  | -2.065 | -2.191 | 1.42  | 0.807  |
| P95L | 0.379    | -0.522 | -0.385 | 2.48  | 0.324  |
| P95R | 0.121    | -1.221 | -1.231 | 1.37  | 1.11   |
| P95S | 0.01     | -2.208 | -2.315 | -0.21 | 0.646  |
| Y96C | 0.571    | -0.392 | -0.229 | 2.75  | 0.191  |
| Y96D | -0.9475  | 0.721  | 0.868  | 0.99  | -0.157 |
| Y96F | 0.5805   | -0.385 | -0.209 | 0.03  | 0.083  |
| Y96H | 0.4485   | 0.119  | 0.269  | -0.25 | 0.471  |
| Y96N | 0.279    | -0.67  | -0.644 | -0.15 | 0.371  |
| Y96S | 0.705    | -1.161 | -1.072 | 0.04  | 0.31   |
| G97A | 0.44     | 0.545  | 0.298  | -2.19 | 0.594  |
| G97C | -1.4305  | 0.898  | 0.516  | -3.08 | 0.829  |
| G97D | -6.6215  | -0.366 | -0.665 | -4.31 | 0.482  |
| G97R | -6.543   | -0.01  | -0.208 | -3.71 | 1.412  |
| G97S | -3.4245  | 0.071  | -0.187 | -4.27 | 0.948  |
| G97V | -5.682   | 1.249  | 1.058  | -1.02 | 0.615  |
| G98A | -0.1075  | 0.457  | 0.745  | 1.65  | 0.707  |
| G98C | -5.9125  | 0.997  | 1.269  | 2.42  | 0.943  |
| G98D | -2.557   | -1.072 | -0.854 | 0.18  | 0.595  |
| G98R | -10.8865 | -0.315 | 0.039  | 2.16  | 1.526  |
| G98S | 0.5515   | -0.013 | 0.335  | 1.04  | 1.062  |
| G98V | -7.607   | 1.233  | 1.6    | 3.1   | 0.729  |
| W99C | -0.38425 | -0.212 | -0.128 | 2.04  | 0.399  |

|       |          |        |        |       |        |
|-------|----------|--------|--------|-------|--------|
| W99G  | -10.1265 | -2.439 | -2.544 | -5.73 | 0.153  |
| W99L  | 0.5495   | -1.393 | -1.488 | -2.41 | 0.196  |
| W99R  | -7.80175 | -1.731 | -1.573 | -0.79 | 0.982  |
| W99S  | -4.8345  | -2.181 | -2.122 | -2.55 | 0.518  |
| V100A | -0.589   | -1.52  | -1.775 | -2.73 | -1.135 |
| V100E | -7.199   | -2.35  | -2.563 | -3.8  | -2.197 |
| V100G | 0.6445   | -2.024 | -2.475 | -5.09 | -1.082 |
| V100L | 0.021    | -0.067 | 0.11   | -0.79 | -1.296 |
| V100M | 0.6725   | -0.173 | -0.174 | -0.88 | -1.242 |
| A101G | -1.8985  | -0.992 | -1.072 | -1.87 | 0.422  |
| A101P | -8.999   | 0.309  | 0.303  | -2.44 | 0.519  |
| A101S | 0.176    | -1.353 | -1.306 | -2.09 | 0.77   |
| A101T | 0.4985   | -1.007 | -0.895 | -1.46 | 0.802  |
| A101V | -4.196   | 0.309  | 0.558  | 1.88  | 0.519  |
| P102A | 0.9835   | -1.322 | -1.332 | -0.77 | -0.033 |
| P102L | -0.006   | -0.408 | -0.387 | -1.04 | 0.065  |
| P102Q | 0.596    | -1.081 | -0.968 | 0.06  | -0.207 |
| P102R | 0.531    | -0.688 | -0.688 | -1.03 | 0.733  |
| P102S | -0.554   | -1.525 | -1.465 | -0.5  | 0.283  |
| P102T | -0.3865  | -1.35  | -1.293 | -0.9  | 0.315  |
| N103D | 0.1985   | -1.296 | -1.331 | -0.11 | -0.232 |
| N103H | -1.7785  | -0.743 | -0.864 | 0.94  | 0.396  |
| N103I | 1.0005   | 0.276  | 0.404  | 2.64  | -0.087 |
| N103K | -0.6065  | 0.009  | 0.103  | -0.38 | 0.29   |
| N103T | 0.6965   | -0.555 | -0.525 | -0.31 | 0.245  |
| N103Y | -0.021   | 0.128  | -0.122 | 1.44  | 0.201  |
| I104F | -0.527   | -1.374 | -1.489 | -0.76 | 0.77   |
| I104L | 0.3365   | -0.537 | -0.399 | -0.59 | 0.675  |
| I104M | -0.1505  | -0.581 | -0.762 | -1    | 0.727  |
| I104N | -0.4365  | -2.281 | -2.412 | -5.26 | 1.058  |
| I104S | -4.291   | -2.709 | -2.919 | -4.99 | 0.996  |
| I104T | -3.34    | -2.242 | -2.408 | -4.34 | 1.007  |

|       |         |        |        |       |       |
|-------|---------|--------|--------|-------|-------|
| I104V | 0.652   | -1.106 | -1.033 | -0.83 | 0.664 |
| Y105D | -4.7025 | -1.906 | -2.147 | -4.34 | 0.412 |
| Y105F | 0.495   | -0.583 | -0.486 | 1.01  | 0.651 |
| Y105H | 0.4855  | -1.637 | -1.739 | -2.04 | 1.039 |
| Y105N | 0.9795  | -1.737 | -1.977 | -4.75 | 0.939 |
| Y105S | -1.0175 | -1.747 | -2.003 | -4.86 | 0.878 |
| Y106C | -0.9445 | -0.155 | 0.038  | 0.98  | 0.648 |
| Y106D | -7.067  | -2.585 | -2.844 | -4.34 | 0.3   |
| Y106F | 0.371   | -0.836 | -0.438 | 1.01  | 0.54  |
| Y106H | -0.389  | -2.091 | -2.255 | -2.29 | 0.928 |
| Y106N | 0.3285  | -1.804 | -2.049 | -4.75 | 0.828 |
| Y106S | -0.7565 | -1.976 | -2.222 | -4.25 | 0.767 |
| L107F | 0.14575 | -1.277 | -1.5   | -0.31 | 0.831 |
| L107I | 0.384   | -0.683 | -0.655 | -0.36 | 0.736 |
| L107S | 1.496   | -2.32  | -2.55  | -4.01 | 1.058 |
| L107V | -0.3525 | -1.188 | -1.419 | -1.91 | 0.725 |
| G108C | -6.635  | -1.312 | -1.62  | -3.08 | 0.791 |
| G108S | -7.8265 | -1.381 | -1.566 | -4.28 | 0.91  |
